# Supplementary material
Source: publisher site journal article supplement (https://static.cambridge.org/content/id/urn:cambridge.org:id:article:S0033822219000924/resource/name/S0033822219000924supp001.xlsx)
Supplement: Supplementary file 1 [file S0033822219000924supp001.xlsx]

## Sheet: SM1.Atm. CO2
No	Sample ID	Collection date	Collection date	AMS lab no	Gliwice		Gliwice		Gliwice monthly means	Jungfraujoch	FFCO2		Monthly means	CRA		d13C IRMS		Constants used in calculations:
				NZA/D-AMS	F14C	unc.	D14C [‰]	unc.	D14C [‰]	D14C [‰]	[%]	unc.	FFCO2 [%]	[BP]	unc.	[VPDB,‰]		lambda=1/8267	0.000120963	decay constant for 14C, 1/yr
1	GdA-2177	26-01-2011	2011.07	NZA-37892	0.956965	0.00217691	-50.0785	0.794948	-50.0785	39.6127	8.62736	0.0764658	68.4524	353.36	18.2736	-13.1
2	GdA-2206	02-02-2011	2011.09	NZA-37893	1.00565	0.00235268	-1.7494	0.859132		39.8956	4.00473	0.0826171		-45.2959	18.7928	-10.89
3	GdA-2207	09-02-2011	2011.11	NZA-37894	0.990727	0.00231212	-16.5692	0.844317		39.8956	5.42985	0.0811925		74.8352	18.7471	-11.6307
4	GdA-2214	16-02-2011	2011.13	NZA-37895	0.96693	0.00227156	-40.1934	0.829504	-23.1502	39.8956	7.70164	0.079768	67.5587	270.143	18.8715	-13.8752
5	GdA-2217	23-02-2011	2011.15	NZA-37896	0.973082	0.00228508	-34.0888	0.834439		39.8956	7.1146	0.0802426		219.195	18.8638	-12.8981
6	GdA-2239	02-03-2011	2011.17	NZA-37897	0.981141	0.00233916	-26.0918	0.854187		39.6085	6.31972	0.0821643		152.943	19.1517	-11.4761
7	GdA-2240	09-03-2011	2011.19	NZA-37898	0.713503	0.00181214	-291.759	0.661732		39.6085	31.8742	0.063652		2711.69	20.402	-21.3
8	GdA-2247	16-03-2011	2011.21	NZA-37899	0.934087	0.00223101	-72.803	0.814687	-109.035	39.6085	10.8129	0.0783648	70.4117	547.735	19.1863	-14.68
9	GdA-2255	23-03-2011	2011.22	NZA-37900	0.990241	0.00232564	-17.066	0.849243		39.6085	5.45153	0.0816887		78.783	18.866	-12.3105
10	GdA-2263	30-03-2011	2011.24	NZA-37901	0.868956	0.00210936	-137.458	0.770262		39.6085	17.032	0.0740915		1128.34	19.4998	-14.6945
11	GdA-2273	06-04-2011	2011.26	NZA-37902	0.910046	0.00216341	-96.6726	0.789999		38.6546	13.0291	0.0760598		757.188	19.0965	-14.4067
12	GdA-2274	13-04-2011	2011.28	NZA-37903	1.00219	0.00254198	-5.2084	0.928236	-56.518	38.6546	4.22306	0.0893691	68.6684	-17.599	20.375	-8.04227
13	GdA-2288	20-04-2011	2011.3	NZA-37904	0.964956	0.00236621	-42.1729	0.864049		38.6546	7.78195	0.0831892		286.56	19.6981	-14.6592
14	GdA-2289	27-04-2011	2011.32	NZA-38485	0.924816	0.00288957	-82.0182	1.05516		38.6546	11.6182	0.101589		627.861	25.099	-14.83
15	GdA-2290	04-05-2011	2011.34	NZA-37905	0.796563	0.00196071	-209.325	0.715973		36.6967	23.7313	0.0690629		1827.1	19.7729	-18.59
16	GdA-2306	11-05-2011	2011.36	NZA-37906	0.859126	0.00208232	-147.227	0.760379		36.6967	17.7413	0.0733464		1219.73	19.4701	-15.08
17	GdA-2307	18-05-2011	2011.38	NZA-37907	0.920566	0.00223101	-86.2435	0.814673	-157.442	36.6967	11.8588	0.0785835	72.0208	664.865	19.4682	-13.79
18	GdA-2316	25-05-2011	2011.4	NZA-37908	0.81909	0.00205532	-186.971	0.750517		36.6967	21.5751	0.072395		1603.08	20.157	-16.5
19	GdA-2320	01-06-2011	2011.42	NZA-37909	0.740734	0.00186616	-264.748	0.681441		34.5	28.9268	0.0658715		2410.81	20.2378	-21
20	GdA-2355	08-06-2011	2011.44	NZA-37910	0.580522	0.0015692	-423.776	0.573001		34.5	44.2993	0.0553892		4368.57	21.7138	-26.51
21	GdA-2358	15-06-2011	2011.45	NZA-38484	0.943058	0.00287606	-63.9263	1.05021	-178.223	34.5	9.51438	0.101518	72.7116	470.953	24.4984	-14.09
22	GdA-2359	22-06-2011	2011.47	NZA-37912	0.983304	0.00235268	-23.9806	0.859092		34.5	5.65303	0.0830442		135.25	19.22	-12
23	GdA-2360	29-06-2011	2011.49	NZA-38469	0.891925	0.00273172	-114.685	0.997498		34.5	14.421	0.0964232		918.762	24.6029	-16.56
24	GdA-2361	06-07-2011	2011.51	NZA-38470	0.939646	0.00315083	-67.3192	1.15053		37.0999	10.0684	0.110937		500.067	26.9363	-15.46
25	GdA-2362	13-07-2011	2011.53	NZA-37913	0.98279	0.00232564	-24.4974	0.849212	-38.4859	37.0999	5.93938	0.0818833	68.0723	139.448	19.009	-11.64
26	GdA-2371	20-07-2011	2011.55	NZA-37914	0.963158	0.00228508	-43.9868	0.834399		37.0999	7.8186	0.080455		301.544	19.0582	-12.92
27	GdA-2383	27-07-2011	2011.57	NZA-37915	0.989199	0.00233916	-18.1404	0.854145		37.0999	5.32642	0.082359		87.2332	18.9957	-12.01
28	GdA-2384	03-08-2011	2011.59	NZA-37916	0.954531	0.00228508	-52.5537	0.834396		36.8904	8.62619	0.080471		373.816	19.2305	-15.39
29	GdA-2388	10-08-2011	2011.61	NZA-37917	0.887426	0.00213638	-119.163	0.780097		36.8904	15.0502	0.0752342		959.387	19.3386	-15.64
30	GdA-2389	17-08-2011	2011.63	NZA-37918	0.893226	0.00217694	-113.408	0.794905	-107.492	36.8904	14.4951	0.0766624	70.3646	907.05	19.5778	-16.29
31	GdA-2390	24-08-2011	2011.65	NZA-37919	0.927043	0.00224453	-79.8446	0.819582		36.8904	11.2582	0.0790423		608.546	19.4493	-13.4
32	GdA-2399	31-08-2011	2011.67	NZA-37920	0.833706	0.00204179	-172.49	0.745549		36.8904	20.1931	0.0719024		1461	19.6732	-18.16
33	GdA-2431	07-09-2011	2011.68	NZA-37921	0.825593	0.0020418	-180.544	0.745551		35.3345	20.8511	0.0720106		1539.55	19.8666
34	GdA-2449	14-09-2011	2011.7	NZA-37922	1.00217	0.00235268	-5.28598	0.859068	-50.9435	35.3345	3.92341	0.0829749	68.4877	-17.3822	18.8583
35	GdA-2450	21-09-2011	2011.72	NZA-37923	0.974488	0.00231212	-32.7602	0.844255		35.3345	6.57707	0.0815442		207.594	19.0595
36	GdA-2451	28-09-2011	2011.74	NZA-40037	1.02242	0.00264463	14.8161	0.965667		35.3345	1.98181	0.093271		-178.139	20.7784	-9.26
37	GdA-2483	05-10-2011	2011.76	NZA-40038	0.982659	0.00256326	-24.6546	0.935952		35.7366	5.83075	0.0903658		140.52	20.954	-11.93
38	GdA-2484	12-10-2011	2011.78	NZA-40039	1.00906	0.00260394	1.55212	0.950806	-7.63635	35.7366	3.30049	0.0918	67.0506	-72.4901	20.7296	-10.59
39	GdA-2485	19-10-2011	2011.8	NZA-40040	0.98742	0.00261751	-19.9343	0.955756		35.7366	5.375	0.0922779		101.699	21.2943	-11.77
40	GdA-2486	26-10-2011	2011.82	NZA-40041	1.02009	0.00265819	12.4914	0.97061		35.7366	2.24431	0.0937121		-159.791	20.9327	-11.76
41	GdA-2501	02-11-2011	2011.84	NZA-40042	0.965245	0.00253614	-41.9478	0.92604		34.6774	7.40571	0.0895004		284.151	21.1063	-13.36
42	GdA-2502	09-11-2011	2011.86	NZA-40043	0.928668	0.00249546	-78.2546	0.911186		34.6774	10.9147	0.0880648		594.473	21.5858	-13.81
43	GdA-2503	16-11-2011	2011.88	NZA-40044	0.782427	0.00217013	-223.408	0.792393	-71.7874	34.6774	24.9435	0.0765836	69.1816	1970.94	22.2802	-12
44	GdA-2504	23-11-2011	2011.9	NZA-40045	0.999585	0.00260394	-7.87108	0.950792		34.6774	4.11225	0.0918926		3.33523	20.9262	-11.33
45	GdA-2505	30-11-2011	2011.91	NZA-40046	1.00001	0.00260394	-7.45609	0.95079		34.6774	4.07214	0.0918924		-0.0427642	20.9174	-11.58
46	GdA-2557	07-12-2011	2011.93	NZA-40047	1.00555	0.00260394	-1.95285	0.950788		34.1477	3.49085	0.0919393		-44.478	20.802
47	GdA-2558	14-12-2011	2011.95	NZA-40048	0.987745	0.00263107	-19.6294	0.96069	-9.74684	34.1477	5.20014	0.0928968	67.1226	99.0519	21.3976	-11.62
48	GdA-2559	21-12-2011	2011.97	NZA-40049	1.00024	0.00261751	-7.23416	0.955736		34.1477	4.00155	0.0924177		-1.89461	21.0215	-11.01
49	GdA-2560	28-12-2011	2011.99	NZA-40050	0.997279	0.00260394	-10.1709	0.950781		34.1477	4.28553	0.0919386		21.885	20.9746	-11.01
50	GdA-2565	04-01-2012	2012.01	NZA-40051	1.02953	0.00268532	21.8367	0.980492		31.2505	0.912856	0.095078		-233.781	20.9524	-9.94
51	GdA-2566	11-01-2012	2012.03	NZA-40052	1.02241	0.00263107	14.7674	0.960681	4.71775	31.2505	1.59836	0.0931569	66.6432	-178.033	20.6721	-10.9
52	GdA-2567	18-01-2012	2012.05	NZA-40053	0.989183	0.00259038	-18.2139	0.945823		31.2505	4.79655	0.0917161		87.3689	21.0361	-11.26
53	GdA-2568	25-01-2012	2012.07	NZA-40054	1.00802	0.00261751	0.480815	0.955725		31.2505	2.98373	0.0926763		-64.1724	20.8591	-10.97
54	GdA-2591	01-02-2012	2012.09	NZA-40055	1.00756	0.00261751	0.0208309	0.955722		33.3269	3.22319	0.0924898		-60.4969	20.8687	-11.57
55	GdA-2592	08-02-2012	2012.11	NZA-40056	1.0109	0.00263107	3.32985	0.960672		33.3269	2.90296	0.0929688		-87.0524	20.9076	-10.84
56	GdA-2593	15-02-2012	2012.13	NZA-40057	0.999653	0.00260394	-7.83138	0.950766	2.42294	33.3269	3.98309	0.0920102	66.7204	2.7903	20.9248	-10.88
57	GdA-2594	22-02-2012	2012.14	NZA-40058	0.996181	0.00260394	-11.2796	0.950764		33.3269	4.31679	0.09201		30.7385	20.9977	-10.95
58	GdA-2595	29-02-2012	2012.16	NZA-40059	1.03563	0.00267176	27.875	0.975522		33.3269	0.527609	0.094406		-281.26	20.7238	-9.9
59	GdA-2627	07-03-2012	2012.18	NZA-40060	0.988545	0.00257682	-18.8625	0.940856		32.4173	4.96696	0.0911313		92.547	20.9395	-11.14
60	GdA-2628	14-03-2012	2012.2	NZA-40061	1.01811	0.00268532	10.4792	0.980469	1.13305	32.4173	2.12492	0.0949683	66.7641	-144.183	21.1874	-10.71
61	GdA-2629	21-03-2012	2012.22	NZA-40062	1.00378	0.00309218	-3.75088	1.12902		32.4173	3.50325	0.109357		-30.2724	24.7461	-12.6
62	GdA-2630	28-03-2012	2012.24	NZA-40063	1.02435	0.00263107	16.6664	0.960657		32.4173	1.52563	0.0930493		-193.256	20.633	-11.25
63	GdA-2651	04-04-2012	2012.26	NZA-40064	0.995937	0.00261751	-11.5356	0.955702		27.6629	3.81434	0.0929977		32.7073	21.1122	-12.95
64	GdA-2652	11-04-2012	2012.28	NZA-40065	0.966005	0.00252258	-41.2451	0.921039	-8.32091	27.6629	6.70531	0.0896246	67.0788	277.833	20.977	-14.43
65	GdA-2653	18-04-2012	2012.3	NZA-40066	1.01035	0.00260395	2.76817	0.950746		27.6629	2.42246	0.0925154		-82.7404	20.7031	-11.25
66	GdA-2654	25-04-2012	2012.32	D-AMS 002908	1.02442	0.00305122	16.7289	1.11405		27.6629	1.06396	0.108406		-193.825	23.9618
67	GdA-2686	02-05-2012	2012.34	D-AMS 002909	0.942756	0.00315584	-64.3261	1.15225		31.5647	9.29566	0.111699		473.529	26.9353	-13.48
68	GdA-2687	09-05-2012	2012.36	D-AMS 002910	0.985312	0.00302242	-22.0917	1.10353		31.5647	5.20146	0.106977		118.862	24.6789	-11.97
69	GdA-2688	16-05-2012	2012.37	D-AMS 002911	0.989165	0.00302153	-18.2703	1.1032	-16.1559	31.5647	4.831	0.106945	67.3399	87.5135	24.5754	-10.85
70	GdA-2689	23-05-2012	2012.39	D-AMS 002912	1.01868	0.00308158	11.0171	1.12513		31.5647	1.99189	0.10907		-148.644	24.3373	-10.58
71	GdA-2690	30-05-2012	2012.41	D-AMS 002913	1.02057	0.00316412	12.8915	1.15526		31.5647	1.81018	0.111991		-163.542	24.9438	-10.33
72	GdA-2736	06-06-2012	2012.43	D-AMS 002914	1.01796	0.00295915	10.3	1.08042		32	2.10272	0.104692		-142.981	23.3855	-10.36
73	GdA-2737	13-06-2012	2012.45	D-AMS 002915	0.973404	0.0028863	-33.9213	1.05382	-8.89984	32	6.38772	0.102114	67.0999	216.535	23.8545	-12
74	GdA-2738	20-06-2012	2012.47	D-AMS 002916	0.977255	0.00278035	-30.1019	1.01513		32	6.01763	0.0983656		184.821	22.8869	-11.65
75	GdA-2739	27-06-2012	2012.49	D-AMS 002917	1.02585	0.00308141	18.1239	1.12505		32	1.34459	0.109016		-205.006	24.1655	-9.43
76	GdA-2772	04-07-2012	2012.51	D-AMS 002918	1.00075	0.00293291	-6.78602	1.07083		29.8595	3.5583	0.103978		-6.04136	23.5769	-12.36
77	GdA-2773	11-07-2012	2012.53	D-AMS 002919	1.00051	0.00295633	-7.02572	1.07938	-145.694	29.8595	3.58158	0.104808	71.6414	-4.12111	23.7711	-11.09
78	GdA-2774	18-07-2012	2012.55	D-AMS 002920	0.733931	0.00263156	-271.601	0.9608		29.8595	29.272	0.0932943		2484.93	28.8546	-9.38
79	GdA-2775	25-07-2012	2012.57	D-AMS 002921	0.707974	0.00217864	-297.364	0.795433		29.8595	31.7736	0.077237		2774.18	24.7579	-10.44
80	GdA-2800	01-08-2012	2012.59	D-AMS 002922	0.756206	0.00250457	-249.497	0.914432		30.1077	27.1433	0.0887706		2244.75	26.6497	-25.71
81	GdA-2801	08-08-2012	2012.6	D-AMS 002923	1.02281	0.0026921	15.093	0.982897		30.1077	1.45758	0.0954169		-181.169	21.1712	-11.06
82	GdA-2802	16-08-2012	2012.62	D-AMS 002924	0.708478	0.0024636	-296.868	0.899467	-132.244	30.1077	31.7419	0.0873178	71.196	2768.46	27.9819	-22.83
83	GdA-2803	22-08-2012	2012.64	D-AMS 002925	0.958033	0.00273103	-49.1991	0.997104		30.1077	7.69889	0.0967961		344.4	22.9321	-13.23
84	GdA-2804	29-08-2012	2012.66	D-AMS 002926	0.926244	0.00320377	-80.75	1.1697		30.1077	10.7618	0.113551		615.468	27.8334
85	GdA-2808	05-09-2012	2012.68	D-AMS 002927	0.968718	0.00278634	-38.599	1.0173		30.2185	6.6799	0.0987456		255.302	23.1388	-13.08
86	GdA-2809	12-09-2012	2012.7	D-AMS 002928	0.980424	0.00299524	-26.9837	1.09356	-30.4114	30.2185	5.55244	0.106149	67.8164	158.813	24.5787	-13.39
87	GdA-2810	19-09-2012	2012.72	D-AMS 002929	0.98523	0.00318392	-22.2168	1.16245		30.2185	5.08972	0.112835		119.536	26.0019	-14.04
88	GdA-2811	26-09-2012	2012.74	D-AMS 002930	0.973514	0.00256635	-33.8462	0.936968		30.2185	6.21856	0.0909485		215.632	21.2043	-14.72
89	GdA-2830	03-10-2012	2012.76	D-AMS 002931	0.984776	0.00258613	-22.6716	0.944189		30.4816	5.15809	0.091626		123.236	21.1233	-15.25
90	GdA-2831	10-10-2013	2012.78	D-AMS 002932	1.01209	0.00273954	4.43338	1.00019		30.4816	2.52777	0.0970609		-96.5346	21.7733	-12.72
91	GdA-2832	17-10-2014	2012.8	D-AMS 002933	0.97344	0.0028166	-33.9267	1.02833	-141.999	30.4816	6.25031	0.0997911	71.5214	216.245	23.2768	-12.52
92	GdA-2833	24-10-2015	2012.82	D-AMS 002934	0.668213	0.00323461	-336.845	1.18094		30.4816	35.6461	0.114601		3238.49	38.9796	-23.18
93	GdA-2834	31-10-2016	2012.83	D-AMS 002935	0.684196	0.00226409	-320.984	0.826607		30.4816	34.107	0.0802156		3048.61	26.6263	-23.25
94	GdA-2885	07-11-2012	2012.85	D-AMS 002936	0.931354	0.00276179	-75.7004	1.00831		26.3017	9.9388	0.0982471		571.276	23.8561	-12.87
95	GdA-2886	14-11-2012	2012.87	D-AMS 002937	0.943879	0.00271432	-63.2717	0.990978	-54.3858	26.3017	8.72778	0.0965582	68.6142	463.96	23.1339	-13.25
96	GdA-2887	21-11-2012	2012.89	D-AMS 002938	0.975649	0.00272603	-31.7449	0.995249		26.3017	5.6559	0.0969743		198.031	22.4761	-12.665
97	GdA-2888	28-11-2012	2012.91	D-AMS 002939	0.960455	0.00256268	-46.826	0.93561		26.3017	7.12536	0.0911633		324.115	21.4622	-11.27
98	GdA-2936	05-12-2012	2012.93	D-AMS 002940	0.9841	0.00271429	-23.3627	0.99096		24.5698	4.67831	0.0967196		128.751	22.1868	-11.45
99	GdA-2937	12-12-2012	2012.95	D-AMS 002941	0.970832	0.00264583	-36.5324	0.965964	-32.2251	24.5698	5.96369	0.09428	67.8795	237.792	21.9224	-11.38
100	GdA-2938	19-12-2012	2012.97	D-AMS 002942	0.950876	0.00267124	-56.3389	0.975238		24.5698	7.89684	0.0951851		404.633	22.5984	-12.35
101	GdA-2939	27-12-2012	2012.99	D-AMS 002943	0.994885	0.00310857	-12.6665	1.1349		24.5698	3.63434	0.110768		41.1953	25.1388	-10.96
102	GdA-2957	02-01-2013	2013.01	D-AMS 002944	1.00688	0.0028912	-0.768478	1.05554		26.5344	2.65971	0.102825		-55.0479	23.0996	-10.43
103	GdA-2958	09-01-2013	2013.03	D-AMS 002945	0.954098	0.00275406	-53.1483	1.00547		26.5344	7.76231	0.0979478		377.463	23.2213	-10.7
104	GdA-2959	16-01-2013	2013.05	D-AMS 002946	0.959527	0.00271252	-47.7625	0.990301	-38.5915	26.5344	7.23764	0.0964703	68.0918	331.881	22.7409	-11.42
105	GdA-2960	23-01-2013	2013.06	D-AMS 002947	0.971751	0.0028476	-35.6338	1.03961		26.5344	6.05612	0.101274		230.191	23.5743	-11.73
106	GdA-2961	30-01-2013	2013.08	D-AMS 002948	0.951589	0.00264442	-55.6445	0.965432		26.5344	8.00547	0.0940477		398.612	22.3544	-11.6

## Sheet: SM2. Tree rings
No	Sample ID	Sample name	early/late wood	AMS lab no	Calendar date	F14C		D14C [‰]		CRA		d13C IRMS		FFCO2		FFCO2
				NZA/D-AMS			unc.	[‰]	unc.	[yBP]	unc.	[VPDB,‰]	unc.	[%]	unc.	mean for site
	Site 1 -Zabrze
1	GdA-3214	1_BS_2008_1_EW	early wood	D-AMS 003847	2008	1.05317	0.00266271	45.7601	0.972664	-416.147	20.3354	-25.74	0.141421	-0.0858896	0.0930902	0.885226
2	GdA-3215	2_BS_2008_1_LW	late wood	D-AMS 003848	2008.5	1.04451	0.00261068	37.1221	0.953626	-349.8	20.1031	-25.86	0.232594	1.08032	0.0909559	0.13761
3	GdA-3216	3_BS_2009_1_EW	early wood	D-AMS 003849	2009	1.03595	0.0030937	28.5344	1.12997	-283.697	24.0253	-26.06	0.172047	1.54184	0.108168
4	GdA-3217	4_BS_2009_1_LW	late wood	D-AMS 003850	2009.5	1.04481	0.00285958	37.3015	1.04442	-352.161	22.0159	-26.25	0.241661	1.07722	0.0996014
5	GdA-3218	5_BS_2010_1_EW	early wood	D-AMS 003851	2010	1.03793	0.00262215	30.3826	0.957616	-299.09	20.3196	-26.31	0.316228	1.0613	0.0919516
6	GdA-3219	6_BS_2010_1_LW	late wood	D-AMS 003852	2010.5	1.03834	0.00264868	30.7494	0.967272	-302.231	20.5174	-26.81	0.128062	1.27663	0.0926436
7	GdA-3220	7_BS_2011_1_EW	early wood	D-AMS 003853	2011	1.03753	0.00272841	29.8555	0.996303	-295.952	21.1524	-24.79	0.172047	0.652273	0.096111
8	GdA-3221	8_BS_2011_1_LW	late wood	D-AMS 003854	2011.5	1.03388	0.00261302	26.193	0.954135	-267.615	20.3284	-25.77	0.134536	0.97198	0.0920744
9	GdA-3222	9_BS_2012_1_EW	early wood	D-AMS 003855	2012	1.03362	0.00262593	25.8484	0.958766	-265.607	20.434	-24.85	0.134536	0.442614	0.0930471
10	GdA-3223	10_BS_2012_1_LW	late wood	D-AMS 003856	2012.5	1.02935	0.00260336	21.5755	0.950489	-232.359	20.3422	-23.06	0.297321	0.833973	0.0922656
	Site 2 - Żerniki
11		11_BS_2008_2_EW GdMS-16314.raw	early wood		2008							-23.87	0.111803
12		12_BS_2008_2_LW GdMS-16319.raw	late wood		2008.5							-22.76	0.232594
13		13_BS_2009_2_EW GdMS-16322.raw	early wood		2009							-24.14	0.111803
14		14_BS_2009_2_LW GdMS-16325.raw	late wood		2009.5							-24.29	0.18868
15		15_BS_2010_2_EW GdMS-16328.raw	early wood		2010							-24.42	0.205913
16		16_BS_2010_2_LW GdMS-16978.raw	late wood		2010.5							-24.1	0.164012
17		17_BS_2011_2_EW GdMS-16981.raw	early wood		2011							-24.41	0.269258
18		18_BS_2011_2_LW GdMS-16984.raw	late wood		2011.5							-24.38	0.172047
19		19_BS_2012_2_EW GdMS-16987.raw	early wood		2012							-24.52	0.10198
20		20_BS_2012_2_LW GdMS-16990.raw	late wood		2012.5							-24.85	0.128062
	Site 3 - Gliwice Łabędy
21	GdA-3224	21_BS_2008_3_EW	early wood	D-AMS 003857	2008	1.03765	0.00279363	30.3532	1.02049	-296.918	21.656	-24.52	0.107703	1.38866	0.0976671	0.888256
22	GdA-3225	22_BS_2008_3_LW	late wood	D-AMS 003858	2008.5	1.04601	0.00262047	38.6125	0.957201	-361.335	20.1496	-24.85	0.1	0.938169	0.0912969	0.22398
23	GdA-3226	23_BS_2009_3_EW	early wood	D-AMS 003859	2009	1.04022	0.0026345	32.7789	0.962242	-316.779	20.3704	-24.79	0.172047	1.13552	0.0921122
24	GdA-3227	24_BS_2009_3_LW	late wood	D-AMS 003860	2009.5	1.04461	0.00262797	37.0963	0.959825	-350.571	20.2345	-24.91	0.164012	1.09679	0.0915342
25	GdA-3228	25_BS_2010_3_EW	early wood	D-AMS 003861	2010	1.03385	0.00277902	26.3303	1.01491	-267.436	21.622	-25.47	0.232594	1.45041	0.0974526
26	GdA-3229	26_BS_2010_3_LW	late wood	D-AMS 003862	2010.5	1.03771	0.00261165	30.1262	0.953747	-297.373	20.2424	-26.41	0.306757	1.33632	0.0913482
27	GdA-3230	27_BS_2011_3_EW	early wood	D-AMS 003863	2011	1.03493	0.0026437	27.2747	0.965368	-275.796	20.5463	-25.66	0.104403	0.901239	0.0931268
28	GdA-3231	28_BS_2011_3_LW	late wood	D-AMS 003864	2011.5	1.03442	0.00279418	26.7322	1.02028	-271.834	21.7282	-24.69	0.116619	0.919955	0.0984577
29	GdA-3232	29_BS_2012_3_EW	early wood	D-AMS 003865	2012	1.02926	0.0026117	21.5261	0.953568	-231.689	20.4092	-24.89	0.107703	0.862089	0.0925426
30	GdA-3233	30_BS_2012_3_LW	late wood	D-AMS 003866	2012.5	1.04991	0.00264936	41.9786	0.967286	-391.214	20.2963	-24.9	0.104403	-1.14658	0.093896
	Site 4 -Gliwice Stara Wieś
31	GdA-3234	31_BS_2008_4_EW	early wood	D-AMS 003867	2008	1.0532	0.00536722	45.7887	1.9606	-416.366	41.0417	-25.06	0.104403	-0.0886206	0.187642	-0.228334
32	GdA-3235	32_BS_2008_4_LW	late wood	D-AMS 003868	2008.5	1.06407	0.00357449	56.5483	1.30568	-498.873	27.0303	-24.74	0.223607	-0.77253	0.124535	0.362786
33	GdA-3236	33_BS_2009_4_EW	early wood	D-AMS 003869	2009	1.02976	0.00311731	22.393	1.13859	-235.588	24.3545	-24.7	0.164012	2.12973	0.108993
34	GdA-3237	34_BS_2009_4_LW	late wood	D-AMS 003870	2009.5	1.05273	0.00316402	45.1628	1.15561	-412.81	24.1798	-23.91	0.180278	0.327525	0.110205
35	GdA-3238	35_BS_2010_4_EW	early wood	D-AMS 003871	2010	1.07822	0.00350457	70.3758	1.27988	-604.984	26.1524	-24.37	0.134536	-2.7789	0.122896
36	GdA-3239	36_BS_2010_4_LW	late wood	D-AMS 003872	2010.5	1.0492	0.00357991	41.5275	1.30735	-385.793	27.4558	-23.86	0.172047	0.244321	0.125215
37	GdA-3240	37_BS_2011_4_EW	early wood	D-AMS 003873	2011	1.04513	0.00287774	37.4036	1.05083	-354.613	22.1491	-23.41	0.141421	-0.0758745	0.101371
38	GdA-3241	38_BS_2011_4_LW	late wood	D-AMS 003874	2011.5	1.04869	0.0030988	40.8955	1.13151	-381.888	23.7721	-23.17	0.412311	-0.446809	0.109191
39	GdA-3242	39_BS_2012_4_EW	early wood	D-AMS 003875	2012	1.04491	0.00310591	37.0578	1.13401	-352.907	23.913	-23.3	0.141421	-0.645244	0.110055
40	GdA-3243	40_BS_2012_4_LW	late wood	D-AMS 003876	2012.5	1.03984	0.0033239	31.9896	1.21356	-313.834	25.7189	-23.6	0.180278	-0.176941	0.117802
	Site 5 -Gliwice Wilcze Gardło
41	GdA-3244	41_BS_2008_5_EW	early wood	D-AMS 003877	2008	1.05425	0.00290289	46.8324	1.0604	-424.379	22.1495	-26.71	0.107703	-0.188509	0.101487	0.349041
42	GdA-3245	42_BS_2008_5_LW	late wood	D-AMS 003878	2008.5	1.05637	0.00291758	48.9	1.06573	-440.511	22.217	-26.39	0.111803	-0.0430405	0.101648	0.245508
43	GdA-3246	43_BS_2009_5_EW	early wood	D-AMS 003879	2009	1.05455	0.00283262	47.004	1.03461	-426.668	21.6064	-26.78	0.107703	-0.226203	0.0990393
44	GdA-3247	44_BS_2009_5_LW	late wood	D-AMS 003880	2009.5	1.04291	0.00263674	35.4154	0.963028	-337.541	20.3351	-27.17	0.18868	1.25709	0.0918396
45	GdA-3248	45_BS_2010_5_EW	early wood	D-AMS 003881	2010	1.04086	0.00298598	33.2908	1.09049	-321.731	23.0778	-26.37	0.18868	0.782052	0.10471
46	GdA-3249	46_BS_2010_5_LW	late wood	D-AMS 003882	2010.5	1.0367	0.00355296	29.1196	1.2975	-289.519	27.5779	-26.06	0.134536	1.43273	0.124273
47	GdA-3250	47_BS_2011_5_EW	early wood	D-AMS 003883	2011	1.0532	0.0031709	45.4121	1.15788	-416.388	24.2216	-26.15	0.156205	-0.848433	0.111698
48	GdA-3251	48_BS_2011_5_LW	late wood	D-AMS 003884	2011.5	1.03029	0.00350021	22.6383	1.27809	-239.74	27.3369	-25.75	0.104403	1.31501	0.123336
49	GdA-3252	49_BS_2012_5_EW	early wood	D-AMS 003885	2012	1.03316	0.00331098	25.3993	1.20889	-262.089	25.7847	-26	0.134536	0.486204	0.117321
50	GdA-3253	50_BS_2012_5_LW	late wood	D-AMS 003886	2012.5	1.04295	0.00272157	35.0755	0.993648	-337.819	20.9894	-26.56	0.205913	-0.476496	0.096455
